## Effects of bacterial lipopolysaccharide and Shiga Toxin on induced Pluripotent Stem Cell-derived Mesenchymal Stem Cells

Daiana Martire-Greco <sup>a,d,\*‡</sup>

Alejandro La Greca <sup>b\*</sup>

Luis Castillo Montañez <sup>a</sup>

Celeste Biani <sup>b</sup>

Antonella Lombardi <sup>b</sup>

Federico Birnberg-Weiss <sup>a</sup>

Alessandra Norris <sup>b</sup>

Flavia Sacerdoti <sup>c,d</sup>

María Marta Amaral <sup>c,d</sup>

Nahuel Rodrigues-Rodriguez <sup>a</sup>

Jose Ramón Pittaluga <sup>a</sup>

Verónica Alejandra Furmento <sup>b</sup>

Verónica Inés Landoni <sup>a,d</sup>

Santiago Gabriel Miriuka <sup>b,d</sup>

Carlos Luzzani <sup>b,d</sup>

Gabriela Cristina Fernández <sup>a,d</sup>

<sup>a</sup>Laboratorio de Fisiología de los Procesos Inflamatorios. Instituto de Medicina Experimental (IMEX-CONICET). Academia Nacional de Medicina, Buenos Aires, Argentina.

<sup>b</sup>Laboratorio de Investigación Aplicada a Neurociencias (LIAN), FLENI-CONICET, Buenos Aires, Argentina.

<sup>c</sup>Laboratorio de Fisiopatogenia, Instituto de Fisiología y Biofísica Bernardo Houssay (IFIBIO Houssay-CONICET), Departamento de Fisiología, Facultad de Medicina, Buenos Aires (Argentina).

<sup>d</sup>Consejo Nacional de Investigaciones Científicas y Técnicas (CONICET), Buenos Aires, Argentina.

\* These authors contributed equally to this work

‡ Corresponding author: [daianamartire@hotmail.com](mailto:daianamartire@hotmail.com)

### **Lead Contact**

Daiana Martire-Greco

### **Running title**

iPSC-MSC response to LPS and Stx.

### **Competing interest**

The authors declare no competing interest.

## Effects of bacterial lipopolysaccharide and Shiga Toxin on induced Pluripotent Stem Cell-derived Mesenchymal Stem Cells

Daiana Martire-Greco<sup>a,d\*‡</sup>, Alejandro La Greca<sup>b\*</sup>, Luis Castillo Montañez<sup>a</sup>, Celeste Biani<sup>b</sup>, Antonella Lombardi<sup>b</sup>, Federico Birnberg-Weiss<sup>a</sup>, Alessandra Norris<sup>b</sup>, Flavia Sacerdoti<sup>c,d</sup>, María M. Amaral<sup>c,d</sup>, Nahuel Rodrigues-Rodriguez<sup>a</sup>, Jose R. Pittaluga<sup>a</sup>, Verónica Furmento<sup>b</sup>, Verónica Landoni<sup>a,d</sup>, Santiago G. Miriuka<sup>b,d</sup>, Carlos Luzzani<sup>b,d</sup>, Gabriela C. Fernández<sup>a,d</sup>

<sup>a</sup>Laboratorio de Fisiología de los Procesos Inflamatorios. Instituto de Medicina Experimental (IMEX-CONICET). Academia Nacional de Medicina, Buenos Aires, Argentina. <sup>b</sup>Laboratorio de Investigación Aplicada a Neurociencias (LIAN), FLENI-CONICET, Buenos Aires, Argentina. <sup>c</sup>Laboratorio de Fisiopatología, Instituto de Fisiología y Biofísica Bernardo Houssay (IFIBIO Houssay-CONICET), Departamento de Fisiología, Facultad de Medicina, Buenos Aires (Argentina). <sup>d</sup>Consejo Nacional de Investigaciones Científicas y Técnicas (CONICET), Buenos Aires, Argentina. \* These authors contributed equally to this work. ‡ Corresponding author: [daianamartire@hotmail.com](mailto:daianamartire@hotmail.com)

---

### Abstract

**Background:** Mesenchymal Stem Cells can be activated and respond to different bacterial toxins. Lipopolysaccharides (LPS) and Shiga Toxin (Stx) are the two main bacterial toxins present in Hemolytic Uremic Syndrome (HUS) that cause endothelial damage. In this work we aimed to study the response of iPSC-MSC to LPS and/or Stx and its effect on the restoration of injured endothelial cells.

**Methods:** iPSC-MSC were used as a source of mesenchymal stem cells (MSC) and Human Microvascular Endothelial Cells-1 (HMEC-1) as a source of endothelial cells. iPSC-MSC were treated or not with LPS and/or Stx. For some experiments, Conditioned Media (CM) were collected from each plate and incubated with an anti-Stx antibody to block the direct effect of Stx, or Polymyxin to block the direct effect of LPS. In CM from both treatments, anti-Stx and Polymyxin were used. Results are expressed as mean  $\pm$  S.E.M. Significant differences ( $p < 0.05$ ) were identified using one way analysis of variance (ANOVA) and Bonferroni's Multiple comparison test.

**Results:** The results obtained showed that LPS induced a pro-inflammatory profile on iPSC-MSC, but not Stx, even though they expressed Gb<sub>3</sub> receptor. Moreover, LPS induced on iPSC-MSC an increment in migration and adhesion to gelatin substrate. Also, the addition of CM of iPSC-MSC treated with LPS+Stx, decreased the capacity of HMEC-1 to close a wound, and did not favor the formation of new tubes. Proteomic analysis of iPSC-MSC treated with LPS and/or Stx revealed specific protein secretion patterns that support many of the functional results described here.

**Conclusions:** In conclusion, these results suggest that iPSC-MSC activated by LPS acquired a pro-inflammatory profile that induces migration and adhesion to extracellular matrix proteins (ECM), but the combination LPS+Stx decreased the repair of endothelial damage. The importance of this work is that it provides knowledge to understand the context in which iPSC-MSC could benefit or not the restoration of tissue injury, taking into account that the inflammatory context in response to a particular bacterial toxin is relevant for iPSC-MSC immunomodulation.

**Keywords:** Mesenchymal Stem Cells, Endothelial injury, Shiga-toxin, Lipopolysaccharide, regeneration, Hemolytic Uremic Syndrome

## 1 Introduction

2 Mesenchymal Stem Cells (MSC) are mul-  
3 tipotent cells associated with the treatment of  
4 different pathologies due to their regenerative  
5 properties, thus providing an interesting ther-  
6 apeutic option for various diseases, mainly  
7 those that are present in an inflammatory re-  
8 sponse and tissue damage [1]. They are an  
9 heterogeneous subset of stromal stem cells that  
10 can be isolated from many adult tissues. How-  
11 ever, isolating MSC and obtaining a consid-  
12 erable number for handling often present dif-  
13 ficulties. In this sense, derivation of MSC  
14 from induced Pluripotent Stem Cells (iPSC) is  
15 a widely accepted method that results in cells  
16 that have similar properties to those obtained  
17 directly from adult tissues. In this sense, our  
18 group described in a previous paper a robust  
19 and fast method to obtain the iPSC-MSC that  
20 were used in this work [2].

21 In recent years, the use of MSC has in-  
22 creased in important clinical applications [1].  
23 It has been described that these cells are in-  
24 volved in immune processes and participate  
25 in the repair of many types of tissue injuries,  
26 mainly in a paracrine fashion by secreting nu-  
27 merous soluble factors [3, 4]. Also, it is widely  
28 reported the capacity of MSC to migrate into  
29 injured sites and to release inflammatory and  
30 growth factors [5]. Some types of MSC, like  
31 those obtained from bone marrow, can poten-  
32 tially move from their niche into the circula-  
33 tion crossing through endothelial cells from  
34 vessel walls to the site of damage and ad-  
35 here to the extracellular matrix (ECM) around  
36 the wound. However, the trafficking of MSC  
37 from their niche to target tissues is a com-  
38 plex process. The migration process is affected  
39 by chemokines, cytokines, growth factors and  
40 mechanical factors such as shear stress, vascu-  
41 lar cyclic stretching, and ECM adhesion [6].

42 Another important aspect of MSC is their

influence on different functions of surround- 43  
ing cells in order to repair tissue damage by 44  
promoting migration, adhesion and differenti- 45  
ation, also determining cellular and biochemi- 46  
cal changes in all phases of tissue damage [1]. 47  
MSC also plays a role in immune processes 48  
as they can respond to bacterial toxins and in- 49  
flammatory cytokines. In this sense, it has 50  
been described that MSC can be polarized in 51  
vitro towards either pro- or anti-inflammatory 52  
phenotypes, depending on the Toll-Like Re- 53  
ceptor (TLR) ligand involved in their activa- 54  
tion [7, 8]. In many infections TLR4 are ac- 55  
tivated with lipopolysaccharides (LPS) which 56  
are endotoxins present on the outer surface of 57  
Gram Negative bacteria, and stimulate MSC 58  
toward a pro-inflammatory phenotype, modu- 59  
lating some of their functions [10]. Also, these 60  
danger signals activate immune cells, and start 61  
an appropriate host response with the aim to 62  
reestablish homeostasis by recruiting them to 63  
the site of injury. However, if the inflamma- 64  
tory response turns out to be excessive, tis- 65  
sue damage repairment may not be possible 66  
[1]. Furthermore, TLRs are crucial in sensing 67  
signals and switching immune responses from 68  
MSC depending on the inflammatory state, 69  
contributing in this way with the immunomod- 70  
ulatory properties that MSC are well known to 71  
have [9]. 72

Hemolytic uremic syndrome (HUS) is a dis- 73  
ease caused by infections with enterohemor- 74  
rhagic Gram-negative bacteria that produce 75  
Shiga toxin (Stx). Once Stx accesses the cir- 76  
culation, it interacts with a globotriaosylce- 77  
ramide glycolipid receptor (Gb<sub>3</sub>) in target cells 78  
and this interaction leads to a cascade of events 79  
that usually culminates with the inhibition of 80  
protein synthesis and cell death. Endothelial 81  
cell damage is a central event in the patho- 82  
physiology of HUS and is the most important 83  
factor of the microangiopathic process typi- 84  
cally found in this disease [12]. In particular, 85

glomerular endothelial injury triggers a thrombotic microangiopathy leading to the formation of platelet and fibrin thrombi that occlude the microvasculature of the glomerulus, affecting renal function and resulting in acute renal failure. In addition to the toxic effects caused by the interaction of Stx with target cells, *in vivo* and *in vitro* evidence have demonstrated that LPS, present in all Gram-negative bacterial infections, potentiate endothelial cell damage by increasing susceptibility of these cells to the toxin [13, 14, 15]. Moreover, the presence of LPS triggers a strong inflammatory response, which can also contribute to endothelial dysfunction [16].

Taking into account that in many infections iPSC-MSC can be activated due to bacterial toxins and this can be decisive to reestablish homeostasis, the aim of this work was to investigate whether LPS and/or Stx treatments modify the iPSC-MSC secretory profile, and/or functions that could modulate the characteristic endothelial damage induced in the context of HUS.

## Materials and Methods

### *Cell cultures and treatments*

iPSC-MSC were obtained and differentiated as previously published [2]. These cells were maintained using alpha-MEM medium (Gibco, Ireland) supplemented with platelet lysate, 10 % of Penicillin-Streptomycin and glutamine (Gibco, Ireland). At 80 % of confluence, cells were trypsinized with 0.25 % of trypsin-EDTA (Gibco, Ireland). Human dermal Microvascular Endothelial Cells-1 (HMEC-1) were used to perform the experiments of endothelial damage. Cells were cultured at 37°C in a 5 % CO<sub>2</sub> humidified atmosphere using MCDB-131 medium (Gibco, Ireland) with phenol red and supplemented with 15 % fetal bovine serum (Na-

tocor, Argentina), penicillin (Gibco, Ireland), streptomycin (Gibco, Ireland), L-glutamine 10 mM (Gibco, Ireland), hydrocortisone 1 µg/mL (Sigma, USA) and endothelial cell growth supplement 20 µg/mL (Abcys, France). We set 4 treatment groups: Control (vehicle: only alpha-MEM), LPS (Sigma, USA, 0,5 ng/ml), Stx (Toxin Technology, USA, 20 ng/ml) and LPS+Stx. We exposed iPSC-MSCs and endothelial cells to Stx for 24 h. We used the type 2 variant of Stx (Stx2), as it is the most relevant in terms of epidemiology [17]. Also, as LPS is present in all Gram negative bacterial infections, and is the principal modulator of the inflammatory response, we use the combination of LPS+Stx for every experiment. Both LPS or Stx were added at the same time in LPS+Stx treatments. Also, Polymyxin B (Sigma, USA) was used in all treatments with Stx in order to avoid LPS contamination.

### *Conditioned Media*

iPSC-MSC were seeded in alpha-MEM and treated with LPS and/or Stx during 24 h. Then, conditioned media (CM) were collected and incubated for 2 h with an anti-Stx antibody (anti-Stx2 variant from Toxin Technology, USA) to block the direct effect of Stx, or Polymyxin (Sigma, USA) to block the direct effect of LPS. In LPS+Stx CM, both anti-Stx and Polymyxin were used.

### *Viability assays*

Cells were plated at subconfluency, treated for 24 h, and then gently washed to remove dead cells. After that, the remaining attached cells were fixed and dyed for 20 min using a solution of 0.1 % crystal violet in 20 % methanol. Then, the crystals were solubilized with 30 % acetic acid and measured with an ELISA detector at 540 nm. Several washes were done in order to eliminate the residual dye.

## 168 *Proliferation*

169 1 x 10<sup>5</sup> iPSC-MSC cells were seeded in 96  
170 well plates with LPS and/or Stx for 48 h at  
171 37°C in 5 % CO<sub>2</sub>. Then 0.5 μCi/well of 3H-  
172 thymidine was added and incubated for an-  
173 other 20 h. After that, cells were harvested,  
174 scintillation fluid was added, and the radioac-  
175 tive thymidine incorporated into DNA was  
176 measured.

## 177 *Migration / Scratch assays*

178 iPSC-MSC or HMEC-1 cells were seeded to  
179 confluence in 24-well plates (Jet Biofil) in the  
180 corresponding culture media. In the case of  
181 iPSC-MSC (migration assays), cells were in-  
182 cubated for 24 h with media containing either  
183 Control or toxins (LPS, Stx, LPS+Stx) before  
184 scratch, while in HMEC-1 cells (wound re-  
185 pair) the conditioned media from treated iPSC-  
186 MSC was added immediately after doing the  
187 scratch. Starting point (time 0) of the exper-  
188 iment was defined as the moment when cells  
189 were returned to the incubator, with an end  
190 point of 18 h. Images were captured at both  
191 instances with a Nikon Eclipse T5 100 micro-  
192 scope and then analyzed with ImageJ software.  
193 We used the freehand tool to manually draw  
194 over the gap edges to determine the area of the  
195 wound at time 0, 6 h (for iPSC-MSC) or 18 h  
196 (for HMEC-1). The percentage of gap closure  
197 was calculated as: [(gap area at 0 h - gap area  
198 at x h)/gap area at 0 h] x100.

## 199 *Adhesion assay*

200 Adhesion of iPSC-MSC was evaluated on  
201 96-well plates previously coated with 2 %  
202 gelatin (40 min at room temperature, Sigma,  
203 USA). Cells were first treated with vehicle  
204 (Control), LPS, Stx and LPS+Stx and then col-  
205 lected with trypsin, counted and seeded in the  
206 gelatin-coated wells (20,000 cells/well). Cells  
207 were allowed to attach for 15 min at 37°C

208 and stained with crystal violet solution. Im-  
209 ages of adhered cells were captured using a  
210 Nikon Eclipse T5 100 microscope and quanti-  
211 fied with the ImageJ software using the count  
212 cell option.

## 213 *Gb<sub>3</sub> measurement by Thin Layer Chromatog-* 214 *raphy (TLC)*

215 Gb<sub>3</sub> levels were detected by TLC and ana-  
216 lyzed by densitometry. iPSC-MSC cells were  
217 cultured in flasks and grown at 37°C in an at-  
218 mosphere of 5 % CO<sub>2</sub> until cells were nearly  
219 confluent. Cells were treated with Stx and/or  
220 LPS as previously described. From each treat-  
221 ment, total cells glycolipids were extracted ac-  
222 cording to the method of Bligh and Dyer et. al  
223 [18]. Briefly, 3 ml of chloroform:methanol 2:1  
224 v/v were incorporated into the cells, and dur-  
225 ing 15 min cells were incubated on ice. Two  
226 ml of chloroform:water (1:1) were added and  
227 centrifuged at 3,000 rpm for 5 min to separate  
228 phases. The lower phase, corresponding to the  
229 neutral glycolipid extract, was brought to dry-  
230 ness and used for Gb<sub>3</sub> determination. One ml  
231 of methanol and 0.1 ml of 1.0 M NaOH was  
232 added to the dried residue, and incubated 16 h  
233 at 37°C. Fractionated lipids were subjected to  
234 TLC with a silica gel 60 aluminum plate previ-  
235 ously activated by incubation 15 min at 100°C,  
236 in a glass tank with a mixture of chloroform,  
237 methanol, and water (65:35:8). To compare  
238 quantities, a purified glycosphingolipid stan-  
239 dard (0.5-1 and 2 μg) (Matreya, USA) was  
240 also added to the plate. After the solvent front  
241 reached the top of the plate, the gel matrix was  
242 air dried and treated with a solution of orci-  
243 nol, water and sulfuric acid (Acros Organics,  
244 USA) to visualize the separated carbohydrate  
245 and glycolipid components. The densitometric  
246 analysis of Gb<sub>3</sub> bands was analyzed by Image  
247 Quant 5.0 software. Values are expressed as  
248 ng of Gb<sub>3</sub>/10<sup>6</sup> cells.

## 249 *ELISA assays*

250 Detection of TNF- $\alpha$  (BioLegend cat.  
251 430205), IL-8 (BioLegend cat. 78141),  
252 TGF- $\beta$  (Biolegend, cat. 436707), and IL-10  
253 (Biolegend, cat. 430601) from iPSC-MSC  
254 were performed with ELISA kits, following  
255 manufacturer's recommendations. Concentra-  
256 tion results were obtained in pg/ml.

## 257 *Tubulogenesis assay*

258 Assays were performed on 96-well plates  
259 coated with geltrex at 37°C for no less than  
260 30 min. Approximately 15,000 HMEC-1  
261 cells/100  $\mu$ l were seeded on coated wells using  
262 EGM-2 media (Lonza, Switzerland) and incu-  
263 bated overnight either with conditioned me-  
264 dia from toxin-treated iPSC-MSC or vehicle  
265 at 37 °C. Images of tube formation were cap-  
266 tured the following day (24 h) using a Nikon  
267 Eclipse T5 100 microscope followed by anal-  
268 ysis on ImageJ software using the count the  
269 branch points option obtained.

## 270 *Mass spectrometry (MS)*

271 LC-MS/MS (Liquid Chromatography with  
272 tandem mass spectrometry) assays and MS  
273 analysis on Conditioned Media of three tech-  
274 nical replicates from vehicle (Control), LPS,  
275 LPS+Stx and Stx-treated iPSC-MSC were  
276 performed at the Proteomics Core Facility  
277 CEQUIBIEM (University of Buenos Aires,  
278 Buenos Aires, Argentina) following specifica-  
279 tions detailed in La Greca et al, 2018 [19].  
280 Briefly, peptides were reduced with dithiothre-  
281 itol (DTT), precipitated with trichloroacetic  
282 acid (TCA) and digested with trypsin. Ap-  
283 proximately, 1  $\mu$ g of protein digests were an-  
284 alyzed by nanoLC-MS/MS in a Thermo Sci-  
285 entific QExactive Mass Spectrometer coupled  
286 to a nanoHPLC EASY-nLC 1000. Data ac-  
287 quisition and configuration for peptide iden-  
288 tification were achieved with XCalibur 3.0.63  
289 software and raw data produced was fed into

Proteome Discoverer software to classify iden- 290  
tified peptides against Homo sapiens protein 291  
sequences database (trypsin specificity) and 292  
quantify abundance (area under the curve strat- 293  
egy). 294

## *Bioinformatic analysis of MS data* 295

Protein abundance obtained from Proteome 296  
Discoverer in the form of area-based quanti- 297  
fication (area under the curve) [20] was em- 298  
ployed for downstream bioinformatic analysis. 299  
Technical replicates were collapsed and sam- 300  
ples normalized by total area (total area per 301  
sample/1000) using custom Python scripting. 302  
Peptide abundance identified as ALBUMIN 303  
(P02768) was excluded from further analy- 304  
sis as it is most likely a residual contami- 305  
nant from the platelet lysate used during iPSC- 306  
MSC routine culture. The rest of the identified 307  
proteins were clustered using a hierarchical- 308  
based approach and plotted in a heatmap 309  
using pheatmap package in R. In order to 310  
aid visualization of identified proteins, Pro- 311  
teinIDs were mapped to Gene Names using the 312  
uniprotID converter ([www.uniprot.org](http://www.uniprot.org)). On- 313  
tological terms classified as “Biological pro- 314  
cesses” (BPs) were determined using DOSE 315  
[21] and clusterProfiler [22] packages keep- 316  
ing only the top ten statistically signifi- 317  
cant over-represented terms (p-value<0.01, q- 318  
value<0.05). These over-represented BPs - 319  
also called enriched- were determined by sta- 320  
tistically testing (Fisher's exact test followed 321  
by hypergeometric distribution test to evalu- 322  
ate significance) the relationship between the 323  
frequency of genes/proteins present in any 324  
given term (observed or sample frequency) 325  
and the frequency of genes/proteins annotated 326  
to the same term (expected or background fre- 327  
quency). Ultimately, this means that enriched 328  
BPs showed observed frequency values higher 329  
than their expected frequency for that term, 330

331 and the difference proved to be significant (p-  
332 value<0.01).

### 333 *Statistical analysis*

334 Results are expressed as mean  $\pm$  S.E.M.  
335 Significant differences (p<0,05) were iden-  
336 tified using one way analysis of variance  
337 (ANOVA) and Bonferroni's Multiple Test  
338 Comparison using GraphPad software pack-  
339 age (Prism 5.0 Version, San Diego, USA).

## 340 **Results**

### 341 *Gb<sub>3</sub>-expressing iPSC-MSCs remained viable* 342 *after LPS and Stx treatments*

343 In order to establish the concentrations of  
344 Stx and LPS to be used with iPSC-MSC  
345 and endothelial cells we set two dose re-  
346 sponse curves with different concentrations.  
347 As a first step in determining the Stx concen-  
348 tration needed to cause endothelial damage,  
349 we treated Human Microvascular Endothelial  
350 Cells (HMEC-1) with different doses of this  
351 toxin, and measured the resultant viability af-  
352 ter 24 h. As shown in Figure 1A, we found  
353 that concentrations of 5, 10 and 20 ng/ml of  
354 Stx were sufficient to cause endothelial cell  
355 death in a dose dependent manner alone. LPS  
356 did not show any additional toxic effect when  
357 combined with Stx. Although LPS alone did  
358 not induce HMEC-1 cytotoxicity, this concen-  
359 tration of LPS was able to modulate endothe-  
360 lial cell functions, by increasing ICAM-1 ex-  
361 pression (Supp. Figure S1). In contrast to the  
362 results observed in endothelial cells, none of  
363 the concentrations of Stx or Stx in combination  
364 with LPS (LPS+Stx) affected iPSC-MSC via-  
365 bility (Figure 1B), or their proliferation mea-  
366 sured by 3H-thymidine incorporation (Figure  
367 1C).

368 In addition, because Stx did not affect iPSC-  
369 MSC viability or proliferation levels, we de-  
370 cided to determine the presence of the Gb<sub>3</sub>

371 receptor in these cells. We obtained simi-  
372 lar levels of Gb<sub>3</sub> expression on iPSC-MSC in  
373 both Control and treated conditions (LPS, Stx,  
374 and LPS+Stx) using thin layer chromatogra-  
375 phy (Figure 1D).

376 These results indicate that even though  
377 iPSC-MSC expresses the Stx receptor, treat-  
378 ment with this toxin alone or in combina-  
379 tion with LPS does not affect cell viability, in  
380 contrast to what was observed for endothelial  
381 cells.

### 382 *LPS induced a pro-inflammatory program on* 383 *iPSC-MSC but not Stx*

384 iPSC-MSC regulate their microenvironment  
385 releasing different cytokines that can modu-  
386 late biological processes in an autocrine or  
387 paracrine way [23]. Moreover, inflammatory  
388 signals released in many infections are asso-  
389 ciated with migration, adhesion to the extra-  
390 cellular matrix and many mechanisms near the  
391 site of inflammation [10]. Therefore, in order  
392 to determine the immunomodulatory contri-  
393 bution of LPS- or Stx-treated iPSC-MSC, we  
394 measured the release of the pro-inflammatory  
395 cytokines IL-8, and TNF- $\alpha$ , and the anti-  
396 inflammatory cytokines TGF- $\beta$  and Il-10. As  
397 shown in Figure 2A and B, only LPS signifi-  
398 cantly increased the release of Il-8 and TNF-  
399  $\alpha$  compared to Control cells. The addition of  
400 Stx alone did not induce the release of IL-8  
401 or TNF- $\alpha$ . Also, when iPSC-MSC were ex-  
402 posed to LPS+Stx, they increased the produc-  
403 tion of Il-8 and TNF- $\alpha$  compared to basal cells,  
404 but TNF- $\alpha$  levels were lower compared to LPS  
405 alone. Additionally, the presence of LPS, Stx  
406 or LPS+Stx decreased significantly the levels  
407 of the TGF- $\beta$  compared to control cells. More-  
408 over, both Il-10 and VEGF levels remained un-  
409 detectable in all conditions (<15.6 and <31.3  
410 pg/ml which are the lower detectable concen-  
411 trations with EIISA kits respectively). These  
412 results indicate that LPS polarizes iPSC-MSC

413 towards a pro-inflammatory phenotype, but  
414 Stx does not contribute to this polarization de-  
415 spite being a bacterial toxin.

#### 416 *LPS and not Stx increased the migration of* 417 *iPSC-MSC*

418 It is known that in some inflammatory  
419 pathologies, iPSC-MSC can respond to a wide  
420 range of extracellular signals and modulate  
421 some of their functions [10, 9]. In this sense,  
422 we investigated the effect of LPS and Stx on  
423 the capacity of iPSC-MSC to migrate after a  
424 wound was performed. First, cells were in-  
425 cubated with LPS, Stx or a combination of  
426 both toxins for 24 h, and then a scratch was  
427 performed mechanically across the cell mono-  
428 layer. We observed that LPS treatment in-  
429 creased the percentage of migration of iPSC-  
430 MSC compared to control cells (Figure 3).  
431 Conversely, Stx did not modify this function  
432 showing similar migration as in basal condi-  
433 tion. The combination of LPS+Stx increases  
434 these percentages similar to LPS alone when  
435 compared to control and Stx treated cells. In  
436 conclusion, the inflammatory stimulus LPS in-  
437 creases the migration of iPSC-MSC, whereas  
438 Stx does not modify this effect.

#### 439 *The combination of LPS+Stx augmented* 440 *iPSC-MSC capacity to adhere to extracellular* 441 *matrix*

442 The fact that iPSC-MSC migrate sensing  
443 inflammatory signals involves an adhesion to  
444 the extracellular matrix (ECM) in order to  
445 reach the site of damage [24]. In this sense,  
446 iPSC-MSC were used for measuring adhesion  
447 to a substrate (gelatin), 24 h after incubation  
448 with LPS, Stx or LPS+Stx. Treated cells  
449 were harvested and settled on gelatine cov-  
450 ered wells. After 15 minutes non-adhered cells  
451 were eliminated by vigorous washing and rem-  
452 nant gelatin-adhered cells were stained with  
453 crystal violet and counted by microscopy. We

454 found that the treatment with LPS or Stx alone  
455 did not alter adhesion to gelatin, although a  
456 slight increase on adherent cells was found.  
457 The combination of both toxins (LPS+Stx)  
458 caused a statistically significant increase in  
459 cell adhesion (Figure 4). This result suggests  
460 that the effect of LPS on iPSC-MSC adhesion  
461 to a gelatin matrix is potentiated by the pres-  
462 ence of Stx.

#### 463 *Conditioned media (CM) from iPSC-MSC ex-* 464 *posed to LPS+Stx decreased the capacity to re-* 465 *pair endothelial damage*

466 In order to investigate the effect of pro-  
467 inflammatory iPSC-MSC on endothelial re-  
468 pair, we performed a wound healing assay. For  
469 this purpose, a scratch was performed across  
470 a monolayer of endothelial cells HMEC-1.  
471 Then, cells were treated with CM obtained  
472 from iPSC-MSC that have been previously  
473 treated or not with LPS, Stx, LPS+Stx for  
474 24 h. Then, the percentage of endothelial  
475 wound repair was measured. Figure 5A shows  
476 that the presence of CM from LPS+Stx-treated  
477 iPSC-MSC reduced wound closure compared  
478 to non-treated iPSC-MSC CM. CM from LPS  
479 and Stx alone-treated iPSC-MSC did not af-  
480 fect this function. Moreover, none of the CM  
481 affected the formation of new tubes on en-  
482 dothelial cells (Figure 5B). These results in-  
483 dicate that the effect of Stx and LPS treatment  
484 on iPSC-MSC does not favor the repair of en-  
485 dothelial damage.

#### 486 *Analysis of proteins secreted by iPSC-MSC* 487 *treated with LPS and or Stx*

488 With the objective to explore the proteins se-  
489 creted by iPSC-MSC in the CM after the treat-  
490 ments with LPS and/or Stx, we performed a  
491 proteomic analysis, as this technique allows  
492 for the simultaneous identification of the pro-  
493 teins present in any given sample, providing a



494 useful and fast method to assess relevant path-  
495 ways or biological processes [25]. Thus, we  
496 studied the expression levels of the proteins se-  
497 creted to the CM by untreated cells (Control)  
498 or cells treated with LPS, Stx and LPS+Stx  
499 iPSC-MSC. Hierarchical clustering of protein  
500 abundance data produced four different groups  
501 revealing specific secretion profiles associated  
502 with each experimental condition (Supp. Fig-  
503 ure S2A). Functional analysis on clustered  
504 data resulted in a set of over-represented onto-  
505 logical terms (Supp. Figure S2B), in the form  
506 of biological processes (BPs), that exposed im-  
507 portant aspects of bacterial toxin treatment.

508 Gene ontology over representation analysis  
509 on clustered data showed that some proteins  
510 are more represented in the CM from iPSC-  
511 MSC after treatment with LPS when com-  
512 pared to control cells or with Stx and LPS+Stx  
513 treatments. The proteins found in the CM  
514 from iPSC-MSC treated with LPS but not with  
515 the combination of both toxins are related  
516 to BPs like “acute inflammatory response”,  
517 “platelet degranulation”, “regulation of fibrin-  
518 olysis” and “extracellular matrix organiza-  
519 tion” (e.g. SERPINE1, AHSG1, FN, THBS1,  
520 PLG, PTX3 and CCN2 (Figura 6A)), in line  
521 with results obtained in Figure 2 where LPS  
522 polarized iPSC-MSC to a pro-inflammatory  
523 profile increasing migration and adhesion to  
524 extracellular matrix (Figure 3 and 4).

525 Furthermore, LPS+Stx increased the ex-  
526 pression of proteins related to BP “IL-12 me-  
527 diated signaling pathway”, “endopeptidase ac-  
528 tivity” and “actin filament organization” (e.g.  
529 PPIA) (Figure 6B). These proteins can be as-  
530 sociated with Figure 5, where a decreased ca-  
531 pacity of wound closure was observed in en-  
532 dothelial cells incubated with the iPSC-MS  
533 treated with LPS+Stx.

## 534 Discussion

535 Immune responses against bacterial toxins  
536 are crucial to resolve infectious pathologies.  
537 Usually, different cell types are recruited to re-  
538 spond and participate in order to reestablish  
539 the altered homeostasis. The mechanisms in-  
540 volved in these processes include the secre-  
541 tion of a wide range of cytokines to the en-  
542 vironment in order to attract different cells  
543 that can positively or negatively modulate tis-  
544 sue damage. Mesenchymal stem cells (MSC)  
545 are known to participate in these processes se-  
546 creting cytokines that are involved in many  
547 mechanisms with the aim of restoring tissue  
548 injury, often present due to infections [10].  
549 In this sense, host immune cells can recog-  
550 nize some bacterial toxins such as LPS and  
551 mount defenses to clear pathogens, releasing  
552 pro-inflammatory cytokines that contribute to  
553 activate immune and non immune cells with  
554 the objective to restore homeostasis. TLR4  
555 recognizes LPS, and cell activation through  
556 this receptor leads to profound cellular and  
557 systemic responses that mobilize innate and  
558 adaptive host immune cells [26]. Another bac-  
559 terial toxin that participates in inflammatory  
560 processes is Shiga toxin (Stx). This multifun-  
561 ctional toxin is capable of inducing cell stress  
562 and activating innate immune responses that  
563 may lead to inflammation increasing the sever-  
564 ity of organ injury in HUS patients [27]. Tak-  
565 ing this into account, we investigated the effect  
566 of LPS and/or Stx on iPSC-MSC. Particularly,  
567 in this work it was studied the induction of  
568 secreted soluble factors from iPSC-MSC ex-  
569 posed to both bacterial toxins and their possi-  
570 ble contribution on endothelial damage.

571 To the best of our knowledge, this is the  
572 first report describing expression of Gb<sub>3</sub> in  
573 iPSC-MSC. This result is relevant for featur-  
574 ing iPSC-MSC as direct potential cellular tar-  
575 gets for Stx. It has been demonstrated that

576 Gb3 mediates the entrance of Stx to target  
577 cells, e.g. endothelial cells, generally causing  
578 cell death [28]. However, we did not observe  
579 any toxic effect on iPSC-MSC after incubation  
580 with Stx, in contrast to what happens with en-  
581 dothelial cells. In line with this result, Gee-  
582 len et. al. showed that although monocytes  
583 express a receptor for Stx, they do not show  
584 any cytotoxic effect after incubation with Stx  
585 [29], indicating that cell death is not the only  
586 possible result after Stx interacts with its re-  
587 ceptor. Furthermore, we observed that iPSC-  
588 MSC cultured with LPS increased their capac-  
589 ity to migrate and adhere to extracellular ma-  
590 trix (ECM) proteins. Interestingly, when we  
591 measured the ability of iPSC-MSC to attach  
592 to the ECM, we observed an additive effect  
593 between LPS and Stx in this function, prob-  
594 ably reflecting the physiopathological events  
595 that occur in a context of infection with a Stx-  
596 producing *E. coli* in HUS. These functional  
597 results (Figure 3 and 4) were consistent with  
598 the secreted proteins obtained in the proteomic  
599 analysis from the CM of iPSC-MSC treated  
600 with LPS. The results showed that iPSC-MSC  
601 contributed to creating an inflammatory envi-  
602 ronment as we observed in ELISA assays (IL-  
603 8 and TNF- $\alpha$  increments, Figure 2) but also  
604 in the proteomic analysis. For example SER-  
605 PINE1 is involved in acute inflammatory re-  
606 sponses as is described in hepatocytes, mono-  
607 cytes, macrophages and bronchiolar cells [30],  
608 AHSG1 is a protein associated with inflam-  
609 mation and chronic diseases such as endotox-  
610 emia and sepsis [31], THBS1 represents a po-  
611 tent pro-inflammatory signal for macrophages,  
612 and is also produced by them [32], PLG is  
613 an enzyme with a crucial role in inflamma-  
614 tion and coagulation [33], FN is a ubiquitous  
615 and essential component of the extracellular  
616 matrix that participates in many events related  
617 to cell migration and adhesion [34] and PTX3  
618 is a prototypic soluble pattern recognition re-

ceptor, expressed at sites of inflammation and  
involved in regulation of tissue homeostasis.  
Systemic levels of PTX3 increase in many (but  
not all) immune-mediated inflammatory condi-  
tions [35]. All these proteins were found  
in higher quantities in the CM of iPSC-MSC  
treated with LPS, in accordance with an in-  
duction of the pro-inflammatory program that  
these cells acquired.

To the best of our knowledge, this is the  
first report describing the expression of Gb<sub>3</sub> in  
iPSC-MSC. This result is relevant for featur-  
ing iPSC-MSC as direct potential cellular tar-  
gets for Stx. It has been demonstrated that Gb3  
mediates the entrance of Stx to target cells, e.g.  
endothelial cells, generally causing cell death  
[28]. However, we did not observe any toxic  
effect on iPSC-MSC after incubation with Stx,  
in contrast to what happens with endothelial  
cells. In line with this result, Monnens et.  
al. [29] showed that although monocytes ex-  
press a receptor for Stx, they do not show any  
cytotoxic effect after incubation with Stx, in-  
dicating that cell death is not the only poss-  
ible result after Stx interacts with its recep-  
tor. Furthermore, we observed that iPSC-MSC  
stimulated with LPS increased their capacity  
to migrate and adhere to extracellular matrix  
(ECM) proteins. Interestingly, when we mea-  
sured the ability of iPSC-MSC to attach to  
the ECM, we observed an additive effect be-  
tween LPS and Stx in this function, probably  
reflecting the physiopathological events that  
occur in a context of infection with a Stx-  
producing *E. coli* in HUS. These functional  
results (Figure 3 and 4) were consistent with  
the secreted proteins obtained in the proteomic  
analysis from the CM of iPSC-MSC treated  
with LPS. The results showed that iPSC-MSC  
contributed to creating an inflammatory envi-  
ronment as we observed in ELISA assays (IL-  
8 and TNF- $\alpha$  increments, Figure 2) but also  
in the proteomic analysis. For example SER-

662 PINE1 is involved in acute inflammatory re-  
663 sponses as is described in hepatocytes, mono-  
664 cytes, macrophages and bronchiolar cells [30],  
665 AHSG1 is a protein associated with inflam-  
666 mation and chronic diseases such as endotox-  
667 emia and sepsis [31], THBS1 represents a po-  
668 tent pro-inflammatory signal for macrophages,  
669 and is also produced by them [32], PLG is  
670 an enzyme with a crucial role in inflamma-  
671 tion and coagulation [33], FN is a ubiquitous  
672 and essential component of the extracellular  
673 matrix that participates in many events related  
674 to cell migration and adhesion [34] and PTX3  
675 is a prototypic soluble pattern recognition re-  
676 ceptor, expressed at sites of inflammation and  
677 involved in regulation of tissue homeostasis.  
678 Systemic levels of PTX3 increase in many (but  
679 not all) immune-mediated inflammatory con-  
680 ditions [35]. All these proteins were found  
681 in higher quantities in the CM of iPSC-MSC  
682 treated with LPS, in accordance with an in-  
683 duction of the pro-inflammatory program that  
684 these cells acquired.

685 Another fact observed in this work was  
686 that Stx treatment did not modulate any of  
687 the iPSC-MSC functions assayed, and did not  
688 generate a pro-inflammatory profile as LPS  
689 did, indicating that LPS is the main inducer of  
690 a pro-inflammatory profile in these cells in a  
691 context of HUS.

692 Although we did not observe an increase in  
693 the percentage of wound repair in endothelial  
694 cells exposed to CM from iPSC-MSC treated  
695 with LPS+Stx, the combination of both toxins  
696 decreased the capacity of iPSC-MSC to restore  
697 the endothelial damage and also, did not mod-  
698 ify the mechanism of new tube formation. We  
699 hypothesize that the treatments with LPS+Stx  
700 on iPSC-MSC induce the release of some fac-  
701 tors that decrease the capacity of endothelial  
702 cells to repair a wound. In this sense, in the  
703 proteomic analysis we found that the use of  
704 LPS+Stx in iPSC-MSC, induced the release

of proteins related to the BP of “IL-12 medi- 705  
ated signalling pathway” such as PPIA, which 706  
is reported to promote apoptosis in endothe- 707  
lial cells and chemotaxis in inflammatory cells 708  
[36]. As Wong and Waterman et.al described 709  
in a previous work, we can speculate that ac- 710  
tivation of TLR4 in iPSC-MSC due to LPS 711  
resulted in the secretion of pro-inflammatory 712  
factors in the CM that are important for early 713  
injury responses, like migration and cell adhe- 714  
sion to ECM, but probably not to resolve tis- 715  
sue damage [1, 10]. However, these mecha- 716  
nisms could prepare the microenvironment for 717  
later iPSC-MSC anti-inflammatory responses 718  
that could facilitate the restoration of tissue in- 719  
jury. This second response could be possible 720  
as it is known that MSC can promote or inhibit 721  
immune responses due to their immunomod- 722  
ulatory properties, determined by the strength 723  
of the inflammatory milieu ([9], Figure 6C). In 724  
this sense, proteomics results in concordance 725  
with the Biological Processes (BPs) “platelet 726  
degranulation”, suggests that soluble media- 727  
tors released after LPS treatment could bring 728  
platelets into the picture. A crucial factor for 729  
endothelial growth and repair is vascular en- 730  
dothelial growth factor (VEGF). It is known 731  
that platelets can participate in the restoration 732  
of tissue (i.e. endothelial) damage interact- 733  
ing with iPSC-MSC through the release of dif- 734  
ferent factors [37]. Degranulation of platelets 735  
by factors released by treated iPSC-MSC may 736  
be of particular interest for endothelial repair, 737  
considering that platelets produce VEGF in 738  
many physiological situations, such as inflam- 739  
mation [38]. Although in our experimental 740  
model we did not include these cells, future 741  
research will be done in this way. It should 742  
be noted that levels of VEGF in ELISA as- 743  
says from CM of treated iPSC-MSC were un- 744  
detectable, even though these cells are known 745  
to produce and release this endothelial growth 746  
factor [39]. The release of VEGF through the 747

748 exosome pathway, could be another mecha-  
749 nism to explain the lack of detection of this  
750 growth factor in our analyses [40], as our  
751 protocol for sample preparation for proteomic  
752 analysis did not break these vesicles [19].

753 In conclusion, in this work we showed that  
754 LPS generates an inflammatory program in  
755 iPSC-MSC that induces migration and adhe-  
756 sion to proteins present in ECM and these re-  
757 sults was in concordance with the secretion  
758 of different proteins observed in ELISAs and  
759 proteomic assays. Stx alone did not induce  
760 inflammatory responses, even though iPSC-  
761 MSC expresses Gb<sub>3</sub>, but when combined with  
762 LPS, it decreased the capacity of endothelial  
763 cells to resolve a wound. The results observed  
764 in this work helps understand the role of iPSC-  
765 MSC in tissue regeneration, indicating that the  
766 immune context generated from these cells in  
767 response to a particular bacterial toxin should  
768 be taken into account.

### 769 Data Availability

770 All LC-MS/MS raw data will be publicly  
771 available at Mass Spectrometry Interactive  
772 Virtual Environment (MassIVE) upon publica-  
773 tion of the manuscript.

### 774 Acknowledgments

775 The authors would like to thank LIAN  
776 (FLENI-CONICET) for allowing us to use  
777 laboratory facilities to perform many of the ex-  
778 periments from this work.

### 779 Declaration of Interests

780 The authors declare no competing interests.

### References

[1] Wang Y, Chen X, Cao W, Shi Y. Plasticity of mesenchymal stem cells in immunomodulation:

- pathological and therapeutic implications. *Nat Immunol.* 2014 Nov;15(11):1009–16.
- [2] Luzzani C, Neiman G, Garate X, Questa M, Solari C, Fernandez Espinosa D, et al. A therapy-grade protocol for differentiation of pluripotent stem cells into mesenchymal stem cells using platelet lysate as supplement. *Stem Cell Res Ther.* 2015 Jan;6:6.
- [3] Cantinieaux D, Quertainmont R, Blacher S, Rossi L, Wanet T, Noël A, et al. Conditioned medium from bone marrow-derived mesenchymal stem cells improves recovery after spinal cord injury in rats: an original strategy to avoid cell transplantation. *PLoS One.* 2013;8(8):e69515.
- [4] Prockop DJ. Repair of tissues by adult stem/progenitor cells (MSCs): controversies, myths, and changing paradigms. *Mol Ther.* 2009 Jun;17(6):939–46.
- [5] Fu X, Liu G, Halim A, Ju Y, Luo Q, Song, et al. Mesenchymal Stem Cell Migration and Tissue Repair. *Cells.* 2019 07;8(8).
- [6] Sacchetti B, Funari A, Michienzi S, Di Cesare S, Piersanti S, Saggio I, et al. Self-renewing osteoprogenitors in bone marrow sinusoids can organize a hematopoietic microenvironment. *Cell.* 2007 Oct;131(2):324–36.
- [7] Walter J, Ware LB, Matthay MA. Mesenchymal stem cells: mechanisms of potential therapeutic benefit in ARDS and sepsis. *Lancet Respir Med.* 2014 Dec;2(12):1016–26.
- [8] Lombardo E, van der Poll T, DelaRosa O, Dalemans W. Mesenchymal stem cells as a therapeutic tool to treat sepsis. *World J Stem Cells.* 2015 Mar;7(2):368–79.
- [9] Kurte M, Vega-Letter AM, Luz-Crawford P, Djouad F, Noël D, Khoury M, et al. Time-dependent LPS exposure commands MSC immunoplasticity through TLR4 activation leading to opposite therapeutic outcome in EAE. *Stem Cell Res Ther.* 2020 09;11(1):416.
- [10] Waterman RS, Tomchuck SL, Henkle SL, Betancourt AM. A new mesenchymal stem cell (MSC) paradigm: polarization into a pro-inflammatory MSC1 or an Immunosuppressive MSC2 phenotype. *PLoS One.* 2010 Apr;5(4):e10088.
- [11] Jiang W, Xu J. Immune modulation by mesenchymal stem cells. *Cell Prolif.* 2020 Jan;53(1):e12712.
- [12] Joseph A, Cointe A, Mariani Kurkdjian P, Rafat C, Hertig A. Shiga Toxin-Associated Hemolytic Uremic Syndrome: A Narrative Review. *Toxins*

- (Basel). 2020 01;12(2).
- [13] Karmali MA. Infection by Shiga toxin-producing *Escherichia coli*: an overview. *Mol Biotechnol*. 2004 Feb;26(2):117–22.
- [14] Forsyth KD, Simpson AC, Fitzpatrick MM, Barratt TM, Levinsky RJ. Neutrophil-mediated endothelial injury in haemolytic uraemic syndrome. *Lancet*. 1989 Aug;2(8660):411–4.
- [15] Boyce TG, Swerdlow DL, Griffin PM. *Escherichia coli* O157:H7 and the hemolytic-uremic syndrome. *N Engl J Med*. 1995 Aug;333(6):364–8.
- [16] Exeni RA, Fernández GC, Palermo MS. Role of polymorphonuclear leukocytes in the pathophysiology of typical hemolytic uremic syndrome. *ScientificWorldJournal*. 2007 Aug;7:1155–64.
- [17] Reyes-Rodriguez NE, Reyes-Rodriguez NE, Barba-León J, Navarro-Ocaña A, Vega-Sanchez V, Anda FRGD, et al. Serotypes and Stx2 subtyping of Shiga toxin producing *Escherichia coli* isolates from cattle carcasses and feces. *Revista Mexicana de Ciencias Pecuarias*. 2020;11(4):1030–1044. Available from: <https://cienciaspecuarias.inifap.gob.mx/index.php/Pecuarias/article/view/5049>.
- [18] BLIGH EG, DYER WJ. A rapid method of total lipid extraction and purification. *Can J Biochem Physiol*. 1959 Aug;37(8):911–7.
- [19] La Greca A, Solari C, Furmento V, Lombardi A, Biani MC, Aban C, et al. Extracellular vesicles from pluripotent stem cell-derived mesenchymal stem cells acquire a stromal modulatory proteomic pattern during differentiation. *Exp Mol Med*. 2018 09;50(9):1–12.
- [20] Ning K, Fermin D, Nesvizhskii AI. Comparative analysis of different label-free mass spectrometry based protein abundance estimates and their correlation with RNA-Seq gene expression data. *J Proteome Res*. 2012 Apr;11(4):2261–71.
- [21] Yu G, Wang LG, Yan GR, He QY. DOSE: an R/Bioconductor package for disease ontology semantic and enrichment analysis. *Bioinformatics*. 2015 Feb;31(4):608–9.
- [22] Yu G, Wang LG, Han Y, He QY. clusterProfiler: an R package for comparing biological themes among gene clusters. *OMICS*. 2012 May;16(5):284–7.
- [23] Al Bahrawy M, Ghaffar K, Gamal A, El-Sayed K, Iacono V. Effect of Inflammation on Gingival Mesenchymal Stem/Progenitor Cells' Proliferation and Migration through Microperforated Membranes: An In Vitro Study. *Stem Cells Int*. 2020;2020:5373418.
- [24] Noronha NdC, Mizukami A, Caliári-Oliveira C, Cominal JG, Rocha JLM, Covas DT, et al. Priming approaches to improve the efficacy of mesenchymal stromal cell-based therapies. *Stem Cell Res Ther*. 2019 05;10(1):131.
- [25] Aslam B, Basit M, Nisar MA, Khurshid M, Rasool MH. Proteomics: Technologies and Their Applications. *J Chromatogr Sci*. 2017 02;55(2):182–196.
- [26] Vijay K. Toll-like receptors in immunity and inflammatory diseases: Past, present, and future. *Int Immunopharmacol*. 2018 Jun;59:391–412.
- [27] Lee MS, Tesh VL. Roles of Shiga Toxins in Immunopathology. *Toxins (Basel)*. 2019 04;11(4).
- [28] Pijpers AHJM, Setten PAV, Heuvel LPWJVD, Assmann KJM, Dijkman HBPM, Pennings AHM, et al. Verocytotoxin-induced apoptosis of human microvascular endothelial cells. *J Am Soc Nephrol*. 2001 Apr;12(4):767–778.
- [29] Geelen JM, van der Velden TJAM, van den Heuvel LPWJ, Monnens LAH. Interactions of Shiga-like toxin with human peripheral blood monocytes. *Pediatr Nephrol*. 2007 Aug;22(8):1181–7.
- [30] Lee J, Lu Y, Oshins R, West J, Moneypenny CG, Han K, et al. Alpha 1 Antitrypsin-Deficient Macrophages Have Impaired Efferocytosis of Apoptotic Neutrophils. *Front Immunol*. 2020;11:574410.
- [31] Lin YH, Zhu J, Meijer S, Franc V, Heck AJR. Glycoproteogenomics: A Frequent Gene Polymorphism Affects the Glycosylation Pattern of the Human Serum Fetuin/ $\alpha$ -2-HS-Glycoprotein. *Mol Cell Proteomics*. 2019 08;18(8):1479–1490.
- [32] Xiao M, Zhang J, Chen W, Chen W. M1-like tumor-associated macrophages activated by exosome-transferred THBS1 promote malignant migration in oral squamous cell carcinoma. *J Exp Clin Cancer Res*. 2018 Jul;37(1):143.
- [33] Baker SK, Strickland S. A critical role for plasminogen in inflammation. *J Exp Med*. 2020 04;217(4).
- [34] Bazan-Socha S, Kuczia P, Potaczek DP, Mastalerz L, Cybulska A, Zareba L, et al. Increased blood levels of cellular fibronectin in asthma: Relation to the asthma severity, inflammation, and prothrombotic blood alterations. *Respir Med*. 2018 08;141:64–71.
- [35] Ramirez GA, Rovere-Querini P, Blasi M, Sartorelli S, Di Chio MC, Baldini M, et al. PTX3

- Intercepts Vascular Inflammation in Systemic Immune-Mediated Diseases. *Front Immunol.* 2019;10:1135.
- [36] Xie Y, Li X, Ge J. Cyclophilin A-FoxO1 signaling pathway in endothelial cell apoptosis. *Cell Signal.* 2019 09;61:57–65.
- [37] Qiao J, An N, Ouyang X. Quantification of growth factors in different platelet concentrates. *Platelets.* 2017 Dec;28(8):774–778.
- [38] Peterson JE, Zurakowski D, Italiano JE Jr, Michel LV, Connors S, Oenick M, et al. VEGF, PF4 and PDGF are elevated in platelets of colorectal cancer patients. *Angiogenesis.* 2012 Jun;15(2):265–73.
- [39] Yang Y, Hu S, Xu X, Li J, Liu A, Han J, et al. The Vascular Endothelial Growth Factors-Expressing Character of Mesenchymal Stem Cells Plays a Positive Role in Treatment of Acute Lung Injury In Vivo. *Mediators Inflamm.* 2016;2016:2347938.
- [40] Olejarz W, Kubiak-Tomaszewska G, Chrzanowska A, Lorenc T. Exosomes in Angiogenesis and Anti-angiogenic Therapy in Cancers. *Int J Mol Sci.* 2020 Aug;21(16).

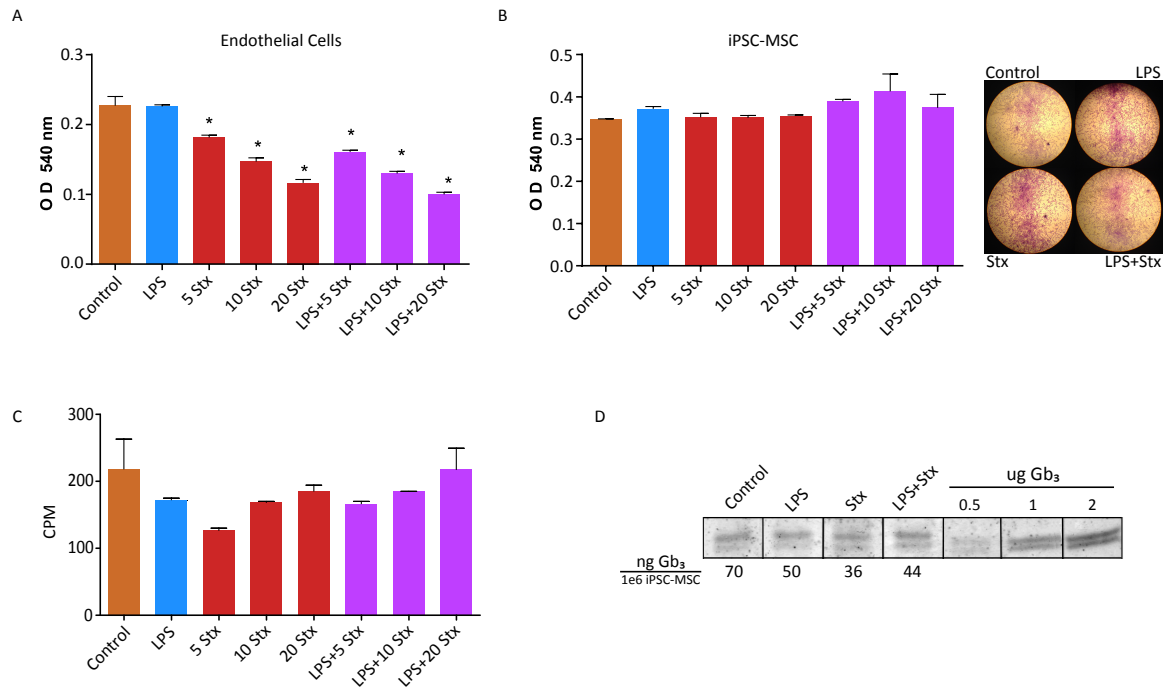

**Figure 1: Effect of Stx and LPS on the viability of endothelial cells, iPSC-MSC and its Gb<sub>3</sub> expression.** (A) Viability of HMEC-1 treated with LPS (500 ng/ml), alone or in combination with different Stx concentrations (5-20 ng/ml) were measured at 540 nm, and optic density (O.D.) from crystal violet were represented from each treatment. (B) Viability of iPSC-MSC treated with LPS (500 ng/ml), alone or in combination with different Stx concentrations (5-20 ng/ml) were measured at 540 nm, and optic density (O.D.) from crystal violet were represented from each treatment. Representative microphotographs depicting iPSC-MSC cultures are shown in the right panel (x10). (C) Proliferation was measured by 3H-thymidine incorporation on control and treated iPSC-MSC, 72 h post stimulus. Counts per minute (CPM) are shown. (D) Thin Layer Chromatography (TLC) assays performed in Control and treated iPSC-MSC to measure the expression of Gb<sub>3</sub> receptor compared to known Gb<sub>3</sub> standards (0.5, 1 and 2 μg). Gb<sub>3</sub> quantification (ng Gb<sub>3</sub>/1e<sup>6</sup> iPSC-MSC) is shown below each treatment column. Results were expressed as mean ± S.E.M. n = 12–18 per group; \*P<0.05.

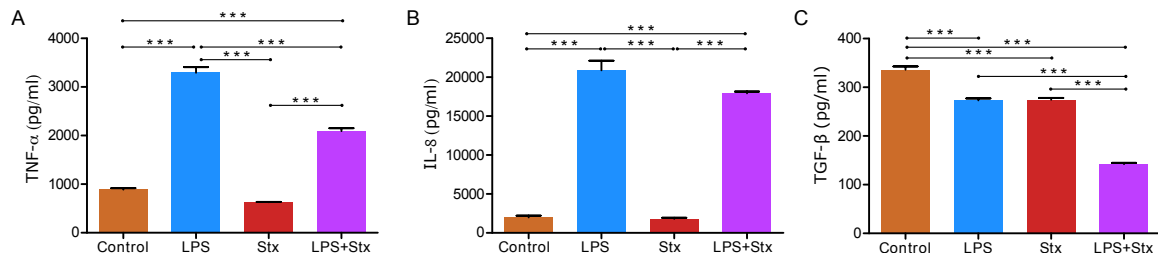

**Figure 2: Inflammatory cytokines are produced by iPSC-MSC in contact with LPS. Stx did not have this effect.** iPSC-MSC were treated with LPS and/or Stx for 24 h and then secreted TNF- $\alpha$  (A), IL-8 (B) and TGF- $\beta$  (C) were determined using ELISA kits. Results were expressed as mean  $\pm$  S.E.M. n = 3 per group; \*\*\*P<0.001.

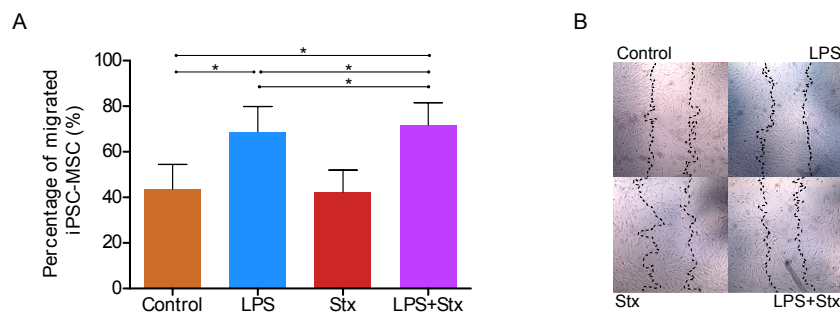

**Figure 3: LPS increased iPSC-MSC migration and Stx did not modulate this function.** Percentage of migrated area from LPS and/or Stx treated or Control iPSC-MSC after 6 h post-scratch over the monolayer of the cells. Representative microphotographs are shown for each treatment in the right panel. The discontinuous line represents the wound at time 0. Results were expressed as mean  $\pm$  S.E.M. n = 8 per group; \*P<0.05.



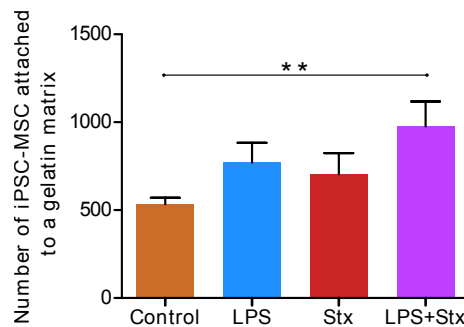

Figure 4: **LPS+Stx increased in iPSC-MSC the adhesion to gelatin.** Adhered iPSC-MSC to gelatin after 24 h of being treated with LPS and/or Stx. Results were expressed as mean  $\pm$  S.E.M. n = 4 per group; \*\*P<0.01.

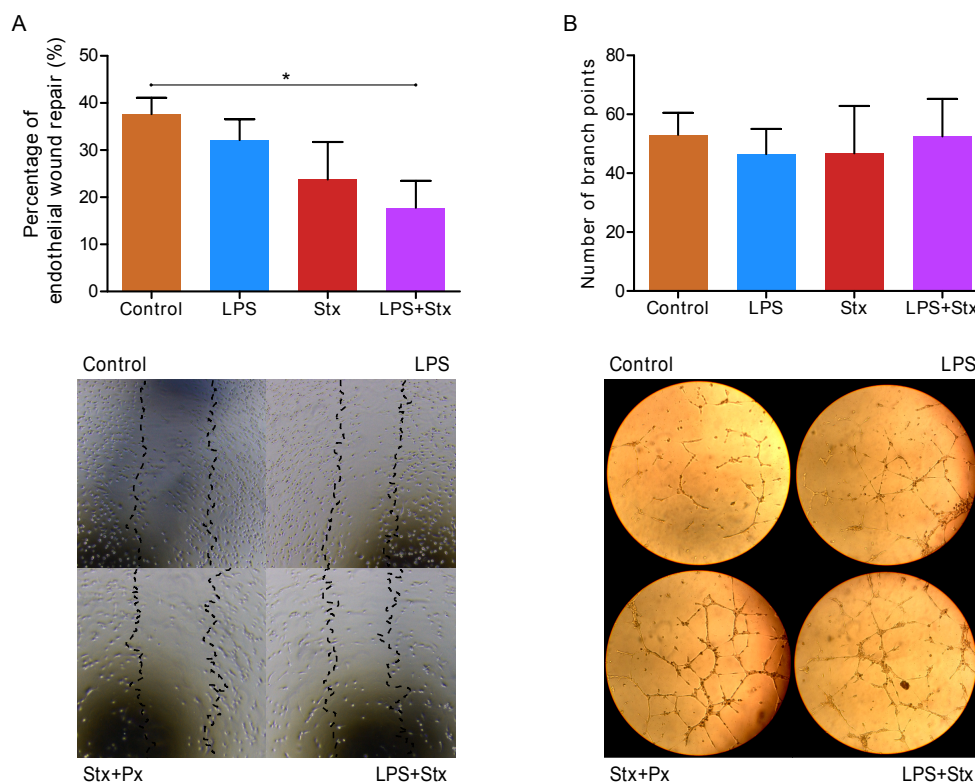

Figure 5: **LPS+Stx decreased in iPSC-MSC repair mechanisms in endothelial cells.** Conditioned media (CM) from iPSC-MSC treated with LPS and/or Stx were added to endothelial cells for (A) wound healing assay (percentage of endothelial wound repair is shown and representatives microphotographs are shown) (B) tubulogenesis assay (number of branch points is shown and representatives microphotographs are shown). Results were expressed as mean  $\pm$  S.E.M. n = 8 per group; \*P<0.05.

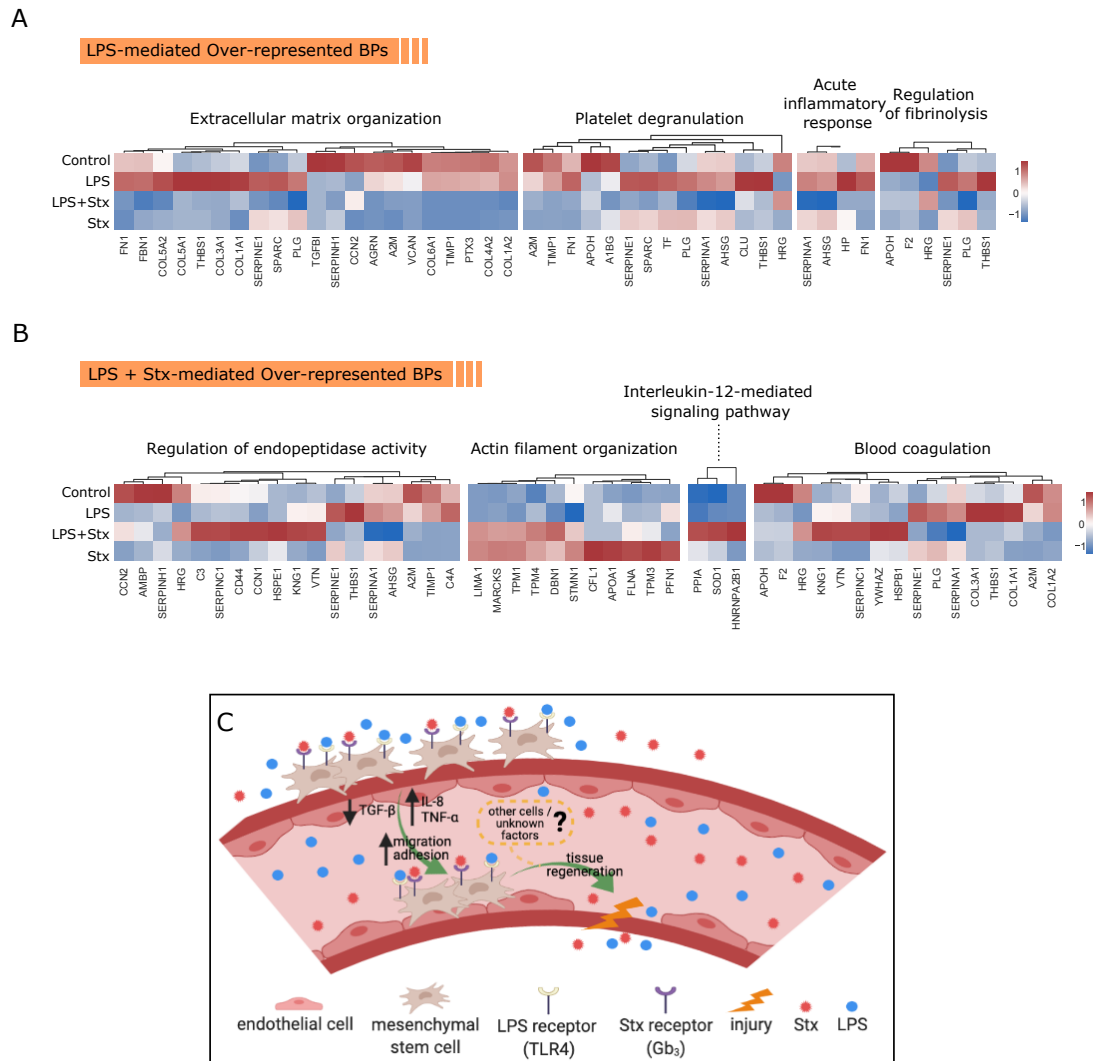

**Figure 6: Protein abundance levels found in over-represented biological processes from toxin-treated iPSC-MSC.** Comparative protein levels among treatments for biological processes found predominantly in (A) clusters 3 and 4 and in (B) clusters 1 and 2. Heatmap was plotted using scaled (z-score) normalized areas in which red color indicates higher abundance while blue represents low abundance. Dendrograms on top of heatmaps reflect hierarchical clustering of proteins. (C) Schematic representation of a segment of a blood vessel and the events triggered by LPS and Stx treatments focusing on MSC response. Created with BioRender (biorender.com).

## Supplemental information

*Supp. Figure S1. LPS-dependent ICAM-1 expression in endothelial cells.* Mean fluorescence intensity (MFI) of ICAM-1 is shown for endothelial cells (HMEC-1) treated or not with 100 ng/ml LPS for 2 h. Results were expressed as mean  $\pm$  S.E.M. n = 6 per group; \*\*P<0.01.

*Supp. Figure S2. Biological processes related to proteins identified in CM of iPSC-MSC reflect the migration, adhesion to substrate and immune response induced by toxins.* (A) Heatmap shows normalized levels of proteins from collapsed technical replicates identified by proteomic analysis in the CM of untreated (Control, n=3) iPSC-MSC or treated with LPS (n=3), Stx (n=3) and LPS+Stx (n=3). Dendrograms represent the unsupervised euclidean (method) clustering of peptides (left). Names of identified proteins are shown to the right of the plot. (B) Overrepresented biological processes related to clustered proteins from (A) ordered by gene ratio (percentage of identified proteins in an ontology term). Size of spheres denotes the number of proteins contained in each process and color features the statistical significance of the algorithm represented by the adjusted p-value (Benjamini-Hochberg).
